# Supplementary material for: Humanmilchbanken: Milchspenden für Frühchen
Source: Springer Nature journal article supplement (doi:10.1007/s43877-022-0733-6), 2023-01-01

## Abbildung 3 und 4 zum Beitrag „Humanmilchbanken: Frauenmilch für Frühchen“ von Nadine Scholten, Tim Ohnhäuser, Till Dresbach

HebammenWissen (4) 1/2023, S. 50 -52

Abbildung 3: Zeitpunkt des ersten Abpumpens/der ersten manuellen Brustentleerung nach der Geburt, n=529

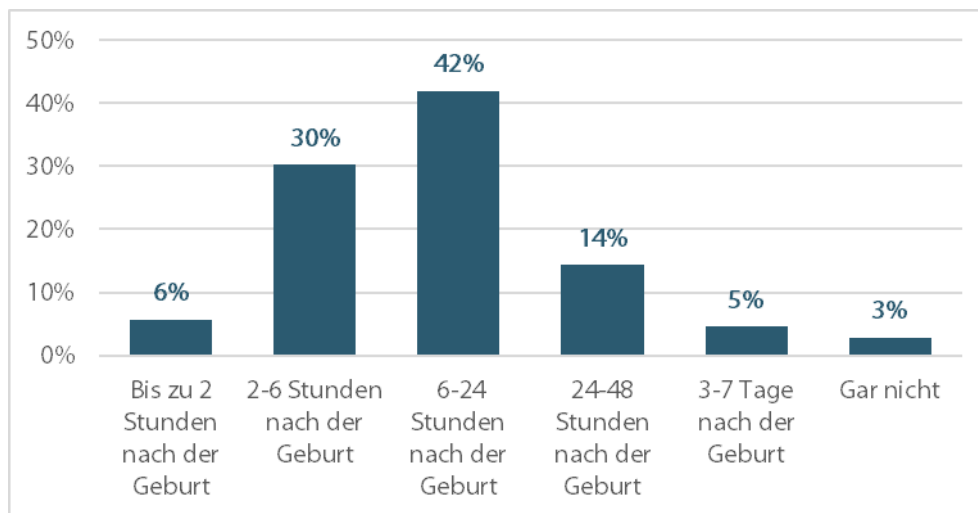

Abbildung 4: Milchmenge 14 Tage nach Geburt, n=501

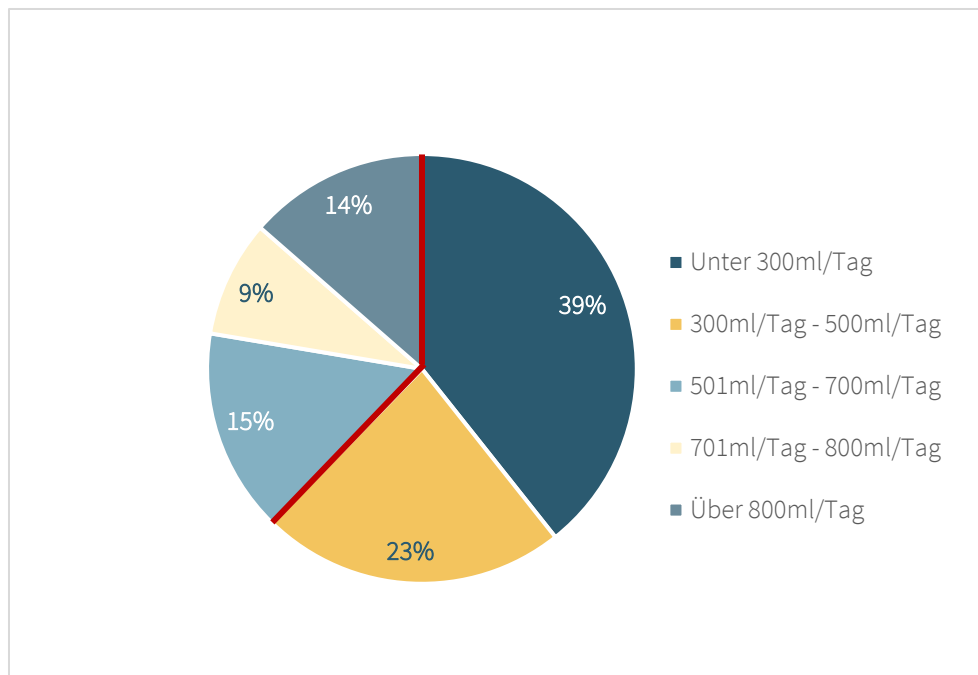

Supplement: MOESM1 [file 23905358]
